# Supplementary material for: Fibroblasts-derived migrasomes promote skin wound healing
Source: Research Square preprint supplement (doi:10.21203/rs.3.rs-4573552/v1), 2024-07-02
Supplement: Supplementary file 1 [file 95c7a4764b805adfd2bb34dd.xlsx]

## Sheet: Fig2e
	HaCaT	Fibroblast
migrasome number per cell	0	7
	3	12
	0	7
	4	7
	0	8
	0	12
	0	6
	1	11
	4	15
	0	6
	0	9
	0	8
	6	10
	0	13
	0	38
	0	17
	0	20
	0	14
	0	11
	1	33
	0	23
	3	66
	0	35
	0	20
	3	11
	0	11
	1	11
	4	16
	0	20
	0	8

## Sheet: Fig3d
	HaCaT cells						Fibroblasts
	Control	Migrasome					Control	Migrasome
absorbance	0.011	0.037				absorbance	0.011	0.024
	0.018	0.032					0.01	0.033
	0.011	0.033					0.008	0.045
	0.009	0.037					0.011	0.041
	0.011	0.045						0.035

## Sheet: Fig3f
	HaCaT cells				Fibroblasts
	Control	Migrasome			Control	Migrasome
the migration cell number per field	19	41		the migration cell number per field	80	192
	28	20			81	88
	16	95			83	91
	25	152			32	90
	39	63			50	87
	37	100			88	80
	48	34			34	88
	29	53			30	88
	30	59			82	150
	30	77			74	115

## Sheet: Fig4c
			group
		day	Control			PBS			Migrasome
		0	0	0	0	0	0	0	0	0	0
		3	9.84991	9.58036	13.3407	3.57834	21.6704	5.90219	41.2322	43.193	52.3276
		6	13.5084	19.3191	15.3253	27.7563	26.4108	19.14	57.4408	57.0029	60
		10	77.8612	69.7545	78.9416	71.1799	67.3815	47.8921	92.1327	84.0353	82.8448
		15	90.1501	92.0032	92.0617	86.6538	92.6637	85.1602	97.2512	96.9638	98.6207

## Sheet: Fig5f
		Ctrl_1	Ctrl_2	Fb_mig_1	Fb_mig_2
	Undefined	22	24	44	10
	Endo	32	18	29	21
	MC	19	17	49	14
	NKT	15	36	38	11
	T_NK	12	31	41	17
	pDC	8	43	37	12
	DC	11	36	30	23
	Mo_Mø	13	23	41	23
	Fib	18	26	34	22
	Krt	30	24	23	23
	Neu	31	26	32	12

## Sheet: Fig5g
		Up	Down
	Endo	193	81
	MC	17	52
	NKT	153	42
	T_NK	34	55
	pDC	48	93
	DC	74	154
	Mo_Mø	159	110
	Fib	232	258
	Krt	119	261
	Neu	177	247

## Sheet: Sfig5c
	Ctrl	Mig
number of blood vessels per m㎡	1.58389	3.20451
	1.72085	3.00521
	1.89867	2.88574

## Sheet: Sfig7b
		Names	total	elements
		fib l-r pairs	55	'Gas6'
				'Lgals3bp'
				'Il1r1'
				'Cxcl13'
				'Efemp2'
				'Il11'
				'Fbln1'
				'Efemp1'
				'S100a9'
				'P4hb'
				'Thbs1'
				'Plat'
				'Rtn4'
				'Fgf7'
				'Il6'
				'Ereg'
				'Vcan'
				'Dcn'
				'Adm'
				'Has2'
				'Ptgs2'
				'Sdc4'
				'Il18r1'
				'Ccl2'
				'Apoe'
				'Rarres2'
				'Ackr3'
				'Angptl4'
				'Tnc'
				'Cxcl12'
				'Lpl'
				'Nt5e'
				'Ccl11'
				'Serping1'
				'Csf3'
				'Lamc1'
				'Il11ra1'
				'Ngf'
				'Cxcl6'
				'Igf1'
				'Thbd'
				'Nampt'
				'Uba52'
				'Penk'
				'Cd55'
				'Ccl7'
				'Col14a1'
				'Tnfsf18'
				'Serpine1'
				'Col1a1'
				'Cav1'
				'Vegfa'
				'Fbn1'
				'Egfr'
				'RT1-T24-3'
		fib	435	'Cd99'
				'Pfn1'
				'Cox7c'
				'Rpl31'
				'Rps8'
				'Rps28'
				'LOC108349606'
				'S100a10'
				'Rpl18'
				'Hspa5'
				'Rpl36a'
				'AC094217.1'
				'Homer1'
				'Lgals7'
				'Atp5f1e'
				'Zeb2'
				'Lbp'
				'LOC100360117'
				'Ifit3'
				'AABR07035218.1'
				'Ndufa11'
				'Rpl12'
				'Cox6b1'
				'Gfpt2'
				'Atrnl1'
				'Uqcr11'
				'Atp5mf'
				'Cox6a1'
				'LOC108348287'
				'Rpl22l1'
				'Mbd2'
				'Sfrp2'
				'Ppia'
				'Ndufb2'
				'Lamtor2'
				'Naa38'
				'Sod1'
				'Ddit4'
				'Adamts4'
				'Serf2'
				'Plec'
				'Rps11'
				'Ubl5'
				'Rpl27'
				'LOC103689965'
				'Lamp2'
				'Ddah1'
				'Lsm5.ENSRNOG00000042126'
				'Msx1'
				'Pdgfrl'
				'LOC108349548'
				'AABR07039448.1'
				'LOC108352650'
				'Ndufa12'
				'LOC100360057'
				'LOC685963'
				'Fkbp2'
				'Tmem256'
				'AABR07002848.1'
				'Has1'
				'Rpl13'
				'Ndufb8'
				'Peli2'
				'Tfpi2'
				'Sem1'
				'Nog'
				'Ppp1r14b'
				'Mx1'
				'Il1rl1'
				'Rps16'
				'Pmepa1'
				'LOC687780'
				'Btg1'
				'Pfdn5'
				'Cfb'
				'C1s'
				'Sap30l'
				'Ost4'
				'Basp1'
				'Neurl3'
				'Tifa'
				'Slfn2'
				'Rps27a'
				'Rps19l2'
				'Spc24'
				'Cyp26b1'
				'Rcn3'
				'Tspan5'
				'Plxdc2'
				'Atp5me'
				'Ccdc80'
				'Fgl2'
				'Rps4x'
				'LOC691427.ENSRNOG00000031802'
				'Cox4i1'
				'Ca4'
				'Ppial4d'
				'AABR07042821.1'
				'Rpl35'
				'Cyp1b1'
				'Phlda1'
				'Rpl28'
				'Rpl32'
				'Ier5l'
				'Rpl11'
				'Sdf4'
				'Ugp2'
				'Hypk'
				'Timp1'
				'Snrpd1'
				'Sod2'
				'Ndufa5'
				'Rpl37a'
				'Srpx'
				'Snrpg'
				'Ptx3'
				'Pcsk5'
				'Uqcrq'
				'Errfi1'
				'H3f3b'
				'Ndufb7'
				'LOC299282'
				'Msn'
				'Ndufa7'
				'C1r'
				'Rpl34'
				'Ifrd1'
				'Uap1'
				'Cyp7b1'
				'Nme2'
				'LOC103689961'
				'AC128960.1'
				'Nedd8'
				'Crabp1'
				'Hs3st5'
				'Krtcap2'
				'Vbp1'
				'LOC100909712'
				'Rpl30'
				'Rpl23a'
				'LOC100909595'
				'Txn1'
				'Plac8'
				'Reep5'
				'Lsm7'
				'Ugdh'
				'Rps27'
				'Cflar'
				'Crip1'
				'Mnda'
				'Lgals1'
				'Atp5mg'
				'Ehbp1'
				'Hs3st1'
				'Timm13'
				'Cxcl1'
				'H2az2'
				'Sh3bgrl3'
				'Tmeff2'
				'Cox7a2l2'
				'Emp3'
				'Rps10.ENSRNOG00000052141'
				'Sdcbp'
				'Aprt'
				'Cadm3'
				'Crem'
				'Atp5mc1'
				'Elob'
				'H2aj'
				'Tgif1'
				'P3h3'
				'Fcgr2a'
				'Junb'
				'LOC103693375'
				'Cd302'
				'Mdm2'
				'LOC100362751'
				'Snrpe'
				'AABR07068316.1'
				'Micos10'
				'Hspb8'
				'Rps24'
				'Ctsh'
				'Atp5if1'
				'Fkbp10'
				'Epas1'
				'Apod'
				'Timm8b'
				'Myl6'
				'Selenoh'
				'C1qtnf7'
				'Tmem258b'
				'LOC102555453'
				'Uqcrh'
				'Slpi'
				'Rps27l'
				'Rpl10a'
				'Irf7'
				'Il23a'
				'Rps9'
				'Hint1'
				'Nucks1'
				'Atp5pf'
				'Mgst3'
				'Selenom'
				'Herpud1'
				'Tomm7'
				'Pelo'
				'LOC100911847'
				'Fxyd5'
				'Bloc1s1'
				'Nfkbiz'
				'Bin1'
				'MT-Mt-nd4l'
				'Ddost'
				'Egr1'
				'Tll1'
				'Rpl19'
				'Pfkfb3'
				'Ppp2cb'
				'Ubc'
				'Rps7'
				'LOC108353446'
				'Oasl2'
				'Actn1'
				'Foxn3'
				'Nlrp3'
				'Rps20'
				'Ier2'
				'Atp5md'
				'Pmp22'
				'Cpxm1'
				'Dad1'
				'Ube2m'
				'RT1-A2'
				'Rps23'
				'Cxcl2'
				'Dync1i2'
				'Rplp1'
				'Hk2'
				'AC141489.1'
				'Cdkn1c'
				'Tpm2'
				'Cavin1'
				'Uqcc2'
				'Grn'
				'Ifi27'
				'Hmgb2'
				'Tmsb4x'
				'Spsb1'
				'Mrpl33'
				'Ctsl'
				'Mmp3'
				'Insig1'
				'S100a11'
				'Cald1'
				'Enpp3'
				'Gbe1'
				'Ptges'
				'Mt1'
				'Ero1a'
				'Ptms'
				'Tmem178a'
				'Sat1'
				'Rps27a.ENSRNOG00000034246'
				'Comt'
				'LOC100910944'
				'LOC103693430'
				'Glul'
				'Lcn2'
				'Rps15'
				'Rpl36'
				'Cox8a'
				'Ndufb4'
				'Tma7'
				'Rps21'
				'Cox17'
				'Prdx5'
				'Ccl20'
				'Rpl32.ENSRNOG00000032605'
				'Anapc13'
				'Ybx3'
				'Meis2'
				'Rps18'
				'Txndc17'
				'Apbb1ip'
				'LOC100361854'
				'Serpinb2'
				'Ndufb11'
				'Rpl41'
				'Dpm3'
				'Nqo1'
				'Fdx1'
				'Plod2'
				'Slc2a1'
				'Ppif'
				'Rpl21.ENSRNOG00000000957'
				'Rpl27a'
				'Rfx3'
				'Tcim'
				'Rab21'
				'Wac'
				'Fxyd3'
				'Rps15a'
				'Tnn'
				'Rbp4'
				'Rpl23'
				'Dnajb1'
				'Atox1'
				'Plp2'
				'LOC100364435'
				'Cacna2d1'
				'Bsg'
				'Col15a1'
				'Rpl26'
				'Rarb'
				'AABR07049085.1'
				'Rbx1'
				'Mrps21'
				'Snrpd2'
				'LOC100360828'
				'Ier3'
				'Ndufa13'
				'Rpl18a'
				'Dbi'
				'P4ha2'
				'LOC100360449'
				'RT1-A1'
				'Rpl37'
				'Lgals3'
				'RT1-CE10'
				'Acta2'
				'MT-Mt-atp8'
				'LOC102556347'
				'Arg1'
				'Cdk2ap1'
				'Ndufa2'
				'Scand1'
				'Pdia6'
				'Slfn4'
				'Tpm1'
				'Ext2'
				'Tagln'
				'Smim14'
				'Htra1'
				'S100a6'
				'RT1-CE4'
				'Cxcl3'
				'Pla2g2a'
				'Rps12'
				'AC095947.1'
				'Edf1'
				'Ctsk'
				'Ckap4'
				'Bola2'
				'Scpep1'
				'Rps13'
				'Lmcd1'
				'Ndufb9'
				'LOC100363469'
				'Rpl24'
				'Gnpnat1'
				'Cops9'
				'Snrpf'
				'Hnrnpa2b1'
				'Pappa1'
				'Postn'
				'Emilin1'
				'Cox5b'
				'Pde10a'
				'Eef1b2'
				'Adora2a'
				'Rpp21'
				'Smpd1'
				'Mrpl52'
				'AABR07054614.1'
				'Cox5a'
				'Sectm1b'
				'Rnd1'
				'Ndufa4'
				'LOC108349682'
				'LOC100360413'
				'Slc39a1'
				'Tgfbi'
				'Rgs2'
				'Ppic'
				'Pcolce'
				'LOC108348144'
				'Plin2'
				'Itm2a'
				'Ccn3'
				'Cox7b'
				'Itm2b'
				'Epb41l2'
				'Snx18'
				'Bmper'
				'Cdh13'
				'Anpep'
				'LOC100359951'
				'Ell2'
				'Ranbp1'
				'Kcnk10'
				'Atp5pd'
				'Angptl8'
				'LOC100359922'
				'Ghr'
				'S100a4'
				'Cpz'
				'Cox6c'
				'Riok3'
				'Rps17'
				'Rpl17'
				'Plpp3'
				'RGD1564664'
				'Id1'
				'Sec61g'
				'Cbr3'
				'Ndufs5'
				'Art3'
				'Uqcr10'
				'Enc1'
				'Atp5mc3'
				'Glud1'
				'Cebpd'
				'Uqcrb'
				'Bnip3'
				'Plac9'
				'Plagl1'
				'Nfkbia'
				'Sec61b'
				'Ndrg1'
				'Stmn1'
				'LOC689574'
				'Fcgrt'
				'Tnfaip6'
		l-r pairs	337	'Sema3e'
				'Tnfrsf12a'
				'Slit3'
				'Cachd1'
				'Ogfr'
				'Cd81'
				'Myoc'
				'Spp1'
				'Nucb2'
				'Fat4'
				'Il6r'
				'Adam12'
				'Qdpr'
				'Col6a2'
				'Bdkrb1'
				'Ramp2'
				'Fst'
				'Epha3'
				'Itga2'
				'Acvr1'
				'Cr1l'
				'Gfra2'
				'Maged1'
				'Anxa1'
				'Cd46'
				'Inhba'
				'Bmp2'
				'Itgb1'
				'Clcf1'
				'Hmg1l1'
				'Ldlr'
				'Cd44'
				'Reln'
				'Acvr2a'
				'Farp2'
				'Pgf'
				'Clec11a'
				'F3'
				'Pde1a'
				'Kidins220'
				'Met'
				'Mrc2'
				'Serpine2'
				'Itgam'
				'Mfge8'
				'Kcnn4'
				'Aqp1'
				'Serpinc1'
				'Olfm2'
				'Calr'
				'Ephb2'
				'Wnt5a'
				'Tmem222'
				'Igfbp4'
				'Kdr'
				'Ptma'
				'Dcbld2'
				'Igf1r'
				'Pdap1'
				'Sirpa'
				'Agtr1a'
				'Fzd2'
				'Tgfbr3'
				'Gpi'
				'Bmp6'
				'Areg'
				'Eda2r'
				'NEWGENE_621351'
				'Crlf1'
				'Robo2'
				'Cd48'
				'Il6st'
				'Nrp1'
				'Cxcl11'
				'Ccl3'
				'Hgf'
				'Cd74'
				'Fgfrl1'
				'Mcam'
				'Epha7'
				'Kitlg'
				'Pdgfc'
				'AABR07044711.1'
				'Cd40'
				'Grem1'
				'Dchs1'
				'Cd47'
				'Dll1'
				'Tgfb2'
				'Lama2'
				'Tgfb3'
				'Flt1'
				'Adam15'
				'Gpc4'
				'Efnb1'
				'Acvr1b'
				'Nppb'
				'Bmpr1a'
				'Bdkrb2'
				'Timp2'
				'Angpt1'
				'Col17a1'
				'Jag1'
				'Npr1'
				'Gnai2'
				'Hsp90b1'
				'Itga11'
				'Nrg1'
				'Il3ra'
				'Tfrc'
				'AABR07006142.1'
				'AABR07031193.1'
				'Sfrp1'
				'F2r'
				'Pdgfd'
				'Lifr'
				'Epha4'
				'Il10rb'
				'Icam1'
				'Pdgfrb'
				'Cd24'
				'Ddr2'
				'Ednrb'
				'Col6a1'
				'Gpc1'
				'Plxna1'
				'Lrp5'
				'App'
				'Cspg4'
				'Ifitm1'
				'Ptdss1'
				'Il16'
				'Ramp1'
				'Acvrl1'
				'Unc5b'
				'Cxcr4'
				'Lama4'
				'Artn'
				'Traf3'
				'Lrp6'
				'Itga1'
				'Nid1'
				'Notch1'
				'Gdnf'
				'Cdh2'
				'Pros1'
				'Igf2r'
				'Itgb3bp'
				'Abca1'
				'Plau'
				'Angpt4'
				'Hspa1b'
				'Adora2b'
				'Vcam1'
				'Pgrmc1'
				'Ptn'
				'Osmr'
				'Pdgfa'
				'Mfap5'
				'Canx'
				'Ephb3'
				'Plxna2'
				'Ptprf'
				'Sirpd'
				'Ifitm3'
				'Fgfr2'
				'Hbegf'
				'Itgav'
				'Bmp4'
				'Lamp1'
				'Agtr1b'
				'Pon2'
				'Sema3c'
				'Mylk'
				'Timp3'
				'Il1b'
				'Col11a1'
				'RT1-T24-4'
				'Adcy9'
				'Bmpr1b'
				'Ptpra'
				'Col5a3'
				'Rims1'
				'Calm2'
				'Wnt4'
				'B2m'
				'Cd109'
				'Ror1'
				'Htr2a'
				'Tac1'
				'Mmp9'
				'Ncstn'
				'Rtn4rl1'
				'Tnfsf9'
				'Traf2'
				'Pdgfra'
				'Bambi'
				'Dpp4'
				'Prss23'
				'Il17ra'
				'Csf1'
				'Axl'
				'Sdc1'
				'Pltp'
				'Gpc3'
				'Rgma'
				'Col4a1'
				'Cxcl10'
				'Mfap2'
				'Pigf'
				'Tfpi'
				'Sorbs1'
				'Cd82'
				'C3'
				'Ryk'
				'Psen1'
				'Notch2'
				'Adra2a'
				'Fgf2'
				'Ecm1'
				'Jmjd6'
				'Il1rl2'
				'Tnfrsf21'
				'Plaur'
				'Ltbr'
				'Vangl1'
				'Agrn'
				'Vim'
				'Col3a1'
				'Il15ra'
				'Arf1'
				'Col5a2'
				'Erap1'
				'Inhbb'
				'Sema6a'
				'Robo1'
				'Cd9'
				'Lamb1'
				'Eng'
				'Adam10'
				'Slit2'
				'Il18rap'
				'Sema4b'
				'Calm1'
				'Cthrc1'
				'Psap'
				'Ednra'
				'Bmpr2'
				'Hmmr'
				'Gstp1'
				'Col5a1'
				'Cd14'
				'F13a1'
				'Cxcl9'
				'Amfr'
				'Tnfrsf1b'
				'Ror2'
				'Neo1'
				'Itgae'
				'LOC100359583'
				'Ifitm2'
				'Tgfbr2'
				'Adam9'
				'Lrp1'
				'Itgb3'
				'Efnb2'
				'Fzd1'
				'Sema4a'
				'Lrpap1'
				'Il17rc'
				'Wnt2'
				'Eda'
				'Tgfb1'
				'Il1rap'
				'Itga8'
				'Sema5a'
				'RT1-T24-1'
				'Itgb4'
				'LOC100909964'
				'Il1rn'
				'Lin7c'
				'Bgn'
				'Tnfsf12'
				'Mmp13'
				'Fas'
				'Itga6'
				'Vegfc'
				'Lif'
				'Fgf23'
				'Fgfr1'
				'Ncam1'
				'Il7'
				'Tnfrsf11b'
				'Sdc2'
				'Avpr1a'
				'Fzd4'
				'Nid2'
				'Efna5'
				'Plxnd1'
				'Ptprm'
				'Plxnb2'
				'Apln'
				'St14'
				'Mdk'
				'LOC100909879'
				'Nrp2'
				'Icoslg'
				'Aplp2'
				'Bcam'
				'Col8a1'
				'Cacna1c'
				'Epha2'
				'Angptl1'
				'Tgm2'
				'Tnfrsf1a'
				'Mmp12'
				'Adam17'
				'Il1r2'
				'Calcrl'
				'Mmp2'
				'Col18a1'
				'LOC100910790'
				'Itga9'
				'Fbln2'
				'Fn1'
				'Vldlr'
				'Ntrk2'
				'Lamc2'
				'Lrp8'
				'Thbs2'
				'RGD1560723'
				'Hras'
				'S1pr3'
				'Sema3d'
				'Ntn1'
				'Adrb2'
				'Cdh1'
